# Supplementary material for: Membrane-based methods of virus concentration from water: a review of process parameters and their effects on virus recovery
Source: Royal Society of Chemistry journal article supplement (doi:10.1039/c7ew00016b), 2017-01-01
Supplement: c7ew00016b1.pdf [file c7ew00016b1.pdf]

Electronic Supplementary Information

for the manuscript

**Membrane-based methods of virus concentration from water:  
A review of process parameters and their effects on virus  
recovery**

Original version submitted to the Environmental Science: Water Research and  
Technology journal

by

Hang Shi, Elodie V. Pasco, Volodymyr V. Tarabara\*

Department of Civil and Environmental Engineering, Michigan State University,  
East Lansing, MI 48824, USA

June 24, 2017

\* Corresponding author: tarabara@msu.edu; Phone: (517) 432-1755; Fax: (517) 355-0250

**Table S1.** Norovirus recovery by VIRADEL as a function of water matrix and VIRADEL process parameters.

| Exp. # | Virus <sup>A</sup> | Water type <sup>B</sup> | Sample amendment        | Virus concentration <sup>C</sup>        | Sample volume, L | Filter (+/-) <sup>D</sup> /Treatment <sup>E</sup> | Eluent <sup>F</sup>                                            | Primary recovery <sup>G</sup> , % | Secondary concentration <sup>H</sup> | Total recovery <sup>G</sup> , % | Ref. |
|--------|--------------------|-------------------------|-------------------------|-----------------------------------------|------------------|---------------------------------------------------|----------------------------------------------------------------|-----------------------------------|--------------------------------------|---------------------------------|------|
| 1      | HNoV (GI)          | ground I                | none                    | $1.1 \times 10^7$ GC/L                  | 20               | glass wool (+) / none                             | 3% BE<br>0.5 M Gly<br>pH 9.5 <sup>Δ</sup>                      | not reported                      | PEG precipitation                    | 45                              | 1    |
| 2      |                    | ground II               |                         |                                         |                  |                                                   |                                                                |                                   |                                      | 33                              |      |
| 3      | tap                | $1.3 \times 10^3$ GC/L  |                         | 30                                      |                  |                                                   |                                                                |                                   |                                      |                                 |      |
| 4      | HNoV (GII)         | ground I                |                         | $(1.9 \text{ to } 50) \times 10^6$ GC/L | 10 to 20         |                                                   |                                                                |                                   |                                      | 16                              |      |
| 5      |                    | ground II               |                         |                                         |                  |                                                   |                                                                |                                   |                                      | 32                              |      |
| 6      | HNoV (GII)         | tap                     | 5 mM MgCl <sub>2</sub>  | $4 \times 10^5$ GC/L                    | 2                | cellulose esters(-) / none                        | 0.5 mM H <sub>2</sub> SO <sub>4</sub> → 1 mM NaOH <sup>±</sup> | not reported                      | centrifugal UF                       | $3 \pm 1$                       | 2    |
| 7      |                    | sea                     |                         | $1.8 \times 10^5$ GC/L                  |                  |                                                   |                                                                |                                   |                                      | $1 \pm 1$                       |      |
| 8      |                    | river                   |                         | $3.3 \times 10^6$ GC/L                  |                  |                                                   |                                                                |                                   |                                      | $18 \pm 9$                      |      |
| 9      |                    | bottled                 |                         | $2.2 \times 10^6$ GC/L                  |                  |                                                   |                                                                |                                   |                                      | $17 \pm 7$                      |      |
| 10     |                    | tap                     | 25 mM MgCl <sub>2</sub> | $4 \times 10^5$ GC/L                    |                  |                                                   |                                                                |                                   |                                      | $2 \pm 3$                       |      |
| 11     |                    | sea                     |                         | $1.3 \times 10^6$ GC/L                  |                  |                                                   |                                                                |                                   |                                      | $5 \pm 7$                       |      |
| 12     |                    | river                   |                         | $1.4 \times 10^6$ GC/L                  |                  |                                                   |                                                                |                                   |                                      | $9 \pm 1$                       |      |

| Exp. # | Virus <sup>A</sup> | Water type <sup>B</sup> | Sample amendment        | Virus concentration <sup>C</sup>  | Sample volume, L | Filter (+/-) <sup>D</sup> /Treatment <sup>E</sup> | Eluent <sup>F</sup>                          | Primary recovery <sup>G</sup> , % | Secondary concentration <sup>H</sup> | Total recovery <sup>G</sup> , %       | Ref.  |
|--------|--------------------|-------------------------|-------------------------|-----------------------------------|------------------|---------------------------------------------------|----------------------------------------------|-----------------------------------|--------------------------------------|---------------------------------------|-------|
| 13     |                    | bottled                 |                         | 4.6×10 <sup>6</sup> GC/L          |                  |                                                   |                                              |                                   |                                      | 23 ± 17                               |       |
| 14     |                    | tap                     | 50 mM MgCl <sub>2</sub> | 3.5×10 <sup>5</sup> GC/L          |                  |                                                   |                                              |                                   |                                      | 2 ± 2                                 |       |
| 15     |                    | sea                     |                         | 1.6×10 <sup>6</sup> GC/L          |                  |                                                   |                                              |                                   |                                      | 6                                     |       |
| 16     |                    | bottled                 |                         | 4.1×10 <sup>5</sup> GC/L          |                  |                                                   |                                              |                                   |                                      | 6 ± 5                                 |       |
| 17     |                    | river                   |                         | 3.5×10 <sup>5</sup> GC/L          |                  |                                                   |                                              |                                   |                                      | 4 ± 3                                 |       |
| 18     |                    | tap                     |                         |                                   |                  |                                                   | NanoCeram (+) / none                         |                                   |                                      |                                       | 4 ± 1 |
| 19     | HNoV               | tap                     | none                    | 1.2×10 <sup>6</sup> GC/L          | 10 or 100        | 1MDS (+) / none                                   | 1.5% BE<br>0.05 M Gly<br>pH 9.0 <sup>Δ</sup> | not reported                      | Celite adsorption-elution            | 1 ± 1                                 | 3     |
| 20     |                    | river                   |                         |                                   |                  | NanoCeram (+) / none                              |                                              |                                   |                                      | 12 ± 16                               |       |
| 21     |                    |                         |                         |                                   |                  | 1MDS (+) / none                                   |                                              |                                   |                                      | 0 ± 2                                 |       |
| 22     |                    |                         |                         |                                   |                  | DI                                                |                                              |                                   |                                      | (2.9 to 6.2)×10 <sup>5</sup> GC/L     |       |
| 23     | HNoV (GII)         | tap                     | none                    | (2.2 to 5.8)×10 <sup>5</sup> GC/L |                  | 1MDS (+) / none                                   | 3% BE<br>pH 9                                | not performed                     | same as primary recovery             | 14 to 46                              | 4     |
| 24     |                    | river                   |                         | (7.9 to 13)×10 <sup>5</sup> GC/L  | 0.25             |                                                   |                                              |                                   |                                      | 13 to 24                              |       |
| 25     |                    | DI                      |                         | (6.5 to 57)×10 <sup>5</sup> GC/L  | 0.5              | cellulose esters (-)                              |                                              |                                   |                                      | 0.5 mM H <sub>2</sub> SO <sub>4</sub> |       |

| Exp. # | Virus <sup>A</sup> | Water type <sup>B</sup> | Sample amendment        | Virus concentration <sup>C</sup>            | Sample volume, L       | Filter (+/-) <sup>D</sup> /Treatment <sup>E</sup> | Eluent <sup>F</sup> | Primary recovery <sup>G</sup> , % | Secondary concentration <sup>H</sup> | Total recovery <sup>G</sup> , % | Ref. |
|--------|--------------------|-------------------------|-------------------------|---------------------------------------------|------------------------|---------------------------------------------------|---------------------|-----------------------------------|--------------------------------------|---------------------------------|------|
| 26     |                    | bottled                 |                         | $(3.8 \text{ to } 6.7) \times 10^5$ GC/L    | 0.25                   | cellulose esters (-) / none                       |                     | 25 to 95                          |                                      |                                 |      |
| 27     |                    | tap                     |                         | $(5.8 \text{ to } 6.2) \times 10^5$ GC/L    |                        |                                                   |                     | 36 to 63                          |                                      |                                 |      |
| 28     |                    | river                   |                         | $(1.7 \text{ to } 11) \times 10^5$ GC/L     |                        |                                                   |                     | 24 to 45                          |                                      |                                 |      |
| 29     |                    | DI                      | 25 mM MgCl <sub>2</sub> | $(5.3 \text{ to } 19) \times 10^6$ GC/L     | 0.5                    |                                                   |                     | 172 to 200                        |                                      |                                 |      |
| 30     |                    | bottled                 |                         | $(4.3 \text{ to } 4.5) \times 10^5$ GC/L    |                        |                                                   |                     | 138 to 195                        |                                      |                                 |      |
| 31     |                    | tap                     |                         | $7.9 \times 10^5$ to $6.0 \times 10^7$ GC/L |                        |                                                   |                     | 55 to 104                         |                                      |                                 |      |
| 32     |                    | river                   |                         | $(2.7 \text{ to } 5.5) \times 10^5$ GC/L    | 0.25                   |                                                   |                     | 11 to 18                          |                                      |                                 |      |
| 33     |                    | pond                    |                         | $(4.5 \text{ to } 6.9) \times 10^5$ GC/L    |                        |                                                   |                     | 38 to 39                          |                                      |                                 |      |
| 34     |                    | HNoV (GII)              | DI + tap                | pH 3.5                                      | $1.2 \times 10^3$ GC/L |                                                   |                     | 10                                |                                      |                                 |      |
| 35     | none               |                         |                         | $2.4 \times 10^2$ GC/L                      |                        | <1                                                |                     |                                   |                                      |                                 |      |
| 36     |                    |                         |                         |                                             | <1                     |                                                   |                     |                                   |                                      |                                 |      |
| 37     |                    |                         |                         |                                             | MK (+) / none          | 1% BE<br>0.25 M Gly<br>pH 9.5                     | <1                  |                                   |                                      |                                 |      |

| Exp. # | Virus <sup>A</sup> | Water type <sup>B</sup> | Sample amendment | Virus concentration <sup>C</sup> | Sample volume, L | Filter (+/-) <sup>D</sup> /Treatment <sup>E</sup> | Eluent <sup>F</sup>                                           | Primary recovery <sup>G</sup> , % | Secondary concentration <sup>H</sup>                 | Total recovery <sup>G</sup> , % | Ref. |
|--------|--------------------|-------------------------|------------------|----------------------------------|------------------|---------------------------------------------------|---------------------------------------------------------------|-----------------------------------|------------------------------------------------------|---------------------------------|------|
| 38     | HNoV (GII)         | sea                     | none             | 8.8×10 <sup>4</sup> GC/L         | 40               | NanoCeram (+) / none                              | 3% BE<br>0.1 M Gly<br>pH 9.5 <sup>Δ</sup>                     | <0.1                              | not performed                                        | same as primary recovery        | 6    |
| 39     |                    |                         |                  |                                  |                  |                                                   | 3% BE<br>0.1 M Gly<br>pH 9.5 <sup>†</sup>                     | 111 ± 28                          |                                                      |                                 |      |
| 40     |                    |                         |                  |                                  |                  |                                                   | 3% BE<br>0.1 M Gly<br>0.01% TW 80<br>pH 9.5 <sup>†</sup>      | 88 ± 24                           |                                                      |                                 |      |
| 41     |                    |                         |                  |                                  |                  |                                                   | 3% BE<br>0.1 M Gly<br>0.1% TW 80<br>pH 9.5 <sup>†</sup>       | 119 ± 26                          |                                                      |                                 |      |
| 42     | HNoV (GII)         | DI                      | none             | 9.7×10 <sup>4</sup> GC/L         | 10               | NanoCeram (+) / none                              | 1.5% BE<br>pH 9.8                                             | not reported                      | 1.5% BE,<br>0.1% FeCl <sub>3</sub> ,<br>flocculation | 42 ± 8                          | 7    |
| 43     |                    | tap                     |                  |                                  |                  |                                                   |                                                               |                                   |                                                      | 29 ± 15                         |      |
| 44     |                    | river                   |                  |                                  |                  |                                                   |                                                               |                                   |                                                      | 18 ± 3                          |      |
| 45     | HNoV (GII)         | DI                      | none             | 1.0×10 <sup>5</sup> GC/L         | 1                | 1MDS (+) / none                                   | 1.5% BE,<br>0.05 M Gly,<br>pH 9.5 <sup>Δ</sup>                | 61 ± 11                           | not performed                                        | same as primary recovery        | 8    |
| 46     |                    |                         |                  |                                  |                  |                                                   | 1.5% BE,<br>0.05 M Gly,<br>0.01% TW 80<br>pH 9.5 <sup>Δ</sup> | 68 ± 40                           |                                                      |                                 |      |

| Exp. # | Virus <sup>A</sup> | Water type <sup>B</sup> | Sample amendment              | Virus concentration <sup>C</sup> | Sample volume, L | Filter (+/-) <sup>D</sup> /Treatment <sup>E</sup> | Eluent <sup>F</sup>                                  | Primary recovery <sup>G</sup> , % | Secondary concentration <sup>H</sup> | Total recovery <sup>G</sup> , % | Ref.          |
|--------|--------------------|-------------------------|-------------------------------|----------------------------------|------------------|---------------------------------------------------|------------------------------------------------------|-----------------------------------|--------------------------------------|---------------------------------|---------------|
| 47     |                    |                         |                               |                                  |                  | NanoCeram (+) / none                              | 1.5% BE, 0.05 M Gly, pH 9.5 <sup>Δ</sup>             | 27 ± 13                           |                                      |                                 |               |
| 48     |                    |                         |                               |                                  |                  |                                                   | 1.5% BE, 0.05 M Gly, 0.01% TW 80 pH 9.5 <sup>Δ</sup> | 86 ± 26                           |                                      |                                 |               |
| 49     | HNoV (GII)         | lake                    | pH 6.5 to 7.0                 | (4.6±8.1)×10 <sup>3</sup> GC/L   | 10               | Glasswool (+) / none                              | 3% BE 0.5 M Gly pH 9.5                               | not reported                      | PEG precipitation                    | 2                               | <sup>9</sup>  |
| 50     | HNoV (GI)          | irrigation              | 5 mM AlCl <sub>3</sub> pH 3.5 | 5×10 <sup>4</sup> GC/L           | 10               | Filterite (-) / none                              | 10% TPB, 0.05 M Gly, pH 10                           | not reported                      | PEG precipitation                    | 42 ± 7                          | <sup>10</sup> |
| 51     |                    |                         |                               | 5×10 <sup>5</sup> GC/L           |                  |                                                   |                                                      |                                   |                                      | 26 ± 5                          |               |
| 52     |                    |                         |                               | 5×10 <sup>6</sup> GC/L           |                  |                                                   |                                                      |                                   |                                      | 43 ± 1                          |               |
| 53     |                    |                         |                               | 5×10 <sup>4</sup> GC/L           |                  |                                                   |                                                      |                                   |                                      | 14 ± 1                          |               |
| 54     |                    |                         |                               | 5×10 <sup>5</sup> GC/L           |                  |                                                   |                                                      |                                   |                                      | 13 ± 0                          |               |
| 55     |                    |                         |                               | 5×10 <sup>6</sup> GC/L           |                  |                                                   |                                                      |                                   |                                      | 16 ± 1                          |               |

| Exp. # | Virus <sup>A</sup> | Water type <sup>B</sup> | Sample amendment | Virus concentration <sup>C</sup> | Sample volume, L | Filter (+/-) <sup>D</sup> /Treatment <sup>E</sup> | Eluent <sup>F</sup>                    | Primary recovery <sup>G</sup> , % | Secondary concentration <sup>H</sup>     | Total recovery <sup>G</sup> , % | Ref. |
|--------|--------------------|-------------------------|------------------|----------------------------------|------------------|---------------------------------------------------|----------------------------------------|-----------------------------------|------------------------------------------|---------------------------------|------|
| 56     | HNoV (GII)         |                         |                  | 5×10 <sup>4</sup> GC/L           |                  |                                                   |                                        |                                   | PEG precipitation                        | 38 ± 1                          |      |
| 57     |                    |                         |                  | 5×10 <sup>5</sup> GC/L           |                  |                                                   |                                        |                                   |                                          | 22 ± 7                          |      |
| 58     |                    |                         |                  | 5×10 <sup>6</sup> GC/L           |                  |                                                   |                                        |                                   |                                          | 38 ± 1                          |      |
| 59     |                    |                         |                  | 5×10 <sup>4</sup> GC/L           |                  |                                                   |                                        |                                   | organic flocculation                     | 15 ± 1                          |      |
| 60     |                    |                         |                  | 5×10 <sup>5</sup> GC/L           |                  |                                                   |                                        |                                   |                                          | 15 ± 0                          |      |
| 61     |                    |                         |                  | 5×10 <sup>6</sup> GC/L           |                  |                                                   |                                        |                                   |                                          | 16 ± 1                          |      |
| 62     | MNoV               | ground                  | none             | 5×10 <sup>5</sup> PFU/L          | 10               | NanoCeram (+) / none                              | 1.5% BE, 0.05 M Gly, pH 9 <sup>Δ</sup> | not reported                      | 1.5% BE flocculation<br>⇒ centrifugal UF | 30                              | 11   |
| 63     |                    | surface                 |                  |                                  |                  |                                                   |                                        |                                   |                                          | 6                               |      |
| 64     |                    | DI                      |                  |                                  |                  |                                                   |                                        |                                   |                                          | 100 PFU/L                       |      |

| Exp. # | Virus <sup>A</sup> | Water type <sup>B</sup> | Sample amendment             | Virus concentration <sup>C</sup> | Sample volume, L | Filter (+/-) <sup>D</sup> /Treatment <sup>E</sup> | Eluent <sup>F</sup>                                                | Primary recovery <sup>G</sup> , % | Secondary concentration <sup>H</sup> | Total recovery <sup>G</sup> , % | Ref. |
|--------|--------------------|-------------------------|------------------------------|----------------------------------|------------------|---------------------------------------------------|--------------------------------------------------------------------|-----------------------------------|--------------------------------------|---------------------------------|------|
| 65     |                    |                         |                              | 30 PFU/L                         |                  |                                                   |                                                                    |                                   |                                      | 2 to 16                         |      |
| 66     | MNoV (S7)          | DI                      | none                         | 2.6×10 <sup>7</sup> GC/L         | 5                | cellulose ester (-) /AlCl <sub>3</sub>            | 0.5 mM H <sub>2</sub> SO <sub>4</sub> → 1 mM NaOH                  | 45                                | not performed                        | same as primary recovery        | 12   |
| 67     |                    | tap                     |                              | 2.2×10 <sup>7</sup> GC/L         |                  |                                                   |                                                                    | 31                                |                                      |                                 |      |
| 68     | HNoV (GI)          | bore hole               | 5mM MgCl <sub>2</sub> pH 3.5 | 10 <sup>6</sup> GC/L             | 5                | cellulose esters (-) / none                       | 0.5 mM H <sub>2</sub> SO <sub>4</sub> → Tr alk buffer <sup>Δ</sup> | not reported                      | PEG precipitation                    | 16 to 30                        | 13   |
| 69     |                    | rain                    |                              |                                  | 5                |                                                   |                                                                    |                                   |                                      | 11 to 15                        |      |
| 70     |                    | open well               |                              |                                  | 2                |                                                   |                                                                    |                                   |                                      | 4 to 5                          |      |
| 71     |                    | river                   |                              |                                  | 5                |                                                   |                                                                    |                                   |                                      | 6 to 10                         |      |
| 72     |                    | food processing         |                              |                                  | 1                |                                                   |                                                                    |                                   |                                      | 4 to 12                         |      |



| Exp. # | Virus <sup>A</sup> | Water type <sup>B</sup> | Sample amendment | Virus concentration <sup>C</sup> | Sample volume, L | Filter (+/-) <sup>D</sup> /Treatment <sup>E</sup> | Eluent <sup>F</sup> | Primary recovery <sup>G</sup> , % | Secondary concentration <sup>H</sup> | Total recovery <sup>G</sup> , % | Ref. |
|--------|--------------------|-------------------------|------------------|----------------------------------|------------------|---------------------------------------------------|---------------------|-----------------------------------|--------------------------------------|---------------------------------|------|
| 73     | HNoV (GII)         | bore hole               |                  | 10 <sup>7</sup> GC/L             | 5                |                                                   |                     |                                   |                                      | 23 to 32                        |      |
| 74     |                    | rain                    |                  |                                  | 5                |                                                   |                     |                                   |                                      | 17 to 25                        |      |
| 75     |                    | open well               |                  |                                  | 2                |                                                   |                     |                                   |                                      | 10 to 11                        |      |
| 76     |                    | river                   |                  |                                  | 5                |                                                   |                     |                                   |                                      | 13 to 15                        |      |
| 77     |                    | food processing         |                  |                                  | 1                |                                                   |                     |                                   |                                      | 14 to 24                        |      |

Notes for Table S1:

<sup>A</sup> HNoV (GI): human norovirus genogroup I; HNoV (GII): human norovirus genogroup II; MNoV: murine norovirus.

<sup>B</sup> DI: deionized water; DI+tap: mixture of equal volumes of DI water and tap water.

<sup>C</sup> GC/L: genome copies per liter; PFU/L: plaque forming units per liter.

<sup>D</sup> (+): electropositive filter; (-): electronegative filter.

- E Filter pretreatment, if any.
- F BE: beef extract; Gly: glycine; TW 80: Tween 80; TPB: tryptose phosphate broth; Tr alk buffer: 0.05 M  $\text{KH}_2\text{PO}_4$ , 1 M NaCl, 0.1% (v/v) Triton X-100, pH 9.2. The arrow ( $\rightarrow$ ) indicates sequential application of eluents. In most studies, the elution was performed by filtering the eluent. Additional features of the elution protocol include:
  - $\Delta$  Filters were soaked in the eluent prior to elution. See each study for specific contact time.
  - $\dagger$  Eluent is recirculated.
  - $\perp$  Filter was placed feed side down in a Petri dish containing NaOH and shaken for 10 min.
- G Recoveries were rounded to the nearest integer.
- H The arrow ( $\Leftrightarrow$ ) indicates the sequence of secondary concentration steps.

**Table S2.** Norovirus recovery by crossflow ultrafiltration as a function of water matrix and ultrafiltration process parameters.

| Exp. # | Virus <sup>A</sup> | Water type <sup>B</sup>     | Sample amendm ent <sup>C</sup> | Virus concentration <sup>D</sup> | Sample volume, L | Filter / MWCO <sup>E</sup> / Treatment <sup>F</sup> | Eluent <sup>G</sup>                                  | Primary recovery <sup>8</sup> , % | Secondary concentra- tion | Total recovery <sup>H</sup> , % | Ref. |
|--------|--------------------|-----------------------------|--------------------------------|----------------------------------|------------------|-----------------------------------------------------|------------------------------------------------------|-----------------------------------|---------------------------|---------------------------------|------|
| 1      | HNoV (GII)         | DI + tap                    | none                           | 1.2×10 <sup>3</sup> GC/L         | 10               | Infilco Degremont filter / (NA) / 0.1% BSA          | 1 mM NaOH <sup>±</sup>                               | not reported                      | centrifugal UF            | <1                              | 5    |
| 2      | MNoV-1             | DI                          | none                           | 2×10 <sup>8</sup> GC/L           | 5                | PS / 15 - 20 kDa / none                             | none                                                 | 5 ± 6                             | not performed             | same as primary recovery        | 14   |
| 3      |                    |                             |                                |                                  |                  | PS / 15 - 20 kDa / 3% BE                            |                                                      | 63 ± 30                           |                           |                                 |      |
| 4      |                    | DI + 0.05 M Gly 0.14 M NaCl |                                |                                  |                  | PS / 15 - 20 kDa / none                             |                                                      | 6 ± 5                             |                           |                                 |      |
| 5      |                    |                             |                                |                                  |                  | PS / 15 - 20 kDa / 3% BE                            |                                                      | 53 ± 74                           |                           |                                 |      |
| 6      | MNoV-1             | tap                         | 0.01% NaPP                     | “High seeding level”             | 100              | CTA / 70 kDa / 0.1% NaPP                            | 0.01% NaPP 0.1% TW 80 0.001% antifoam A <sup>†</sup> | not reported                      | centrifugal UF            | 42                              | 15   |
| 7      |                    | surface                     |                                | 10 to 100 PFU/L                  |                  |                                                     |                                                      |                                   |                           | 74                              |      |

| Exp. # | Virus <sup>A</sup> | Water type <sup>B</sup> | Sample amendment <sup>C</sup> | Virus concentration <sup>D</sup> | Sample volume, L | Filter / MWCO <sup>E</sup> / Treatment <sup>F</sup> | Eluent <sup>G</sup>      | Primary recovery <sup>8</sup> , % | Secondary concentration | Total recovery <sup>H</sup> , % | Ref.         |
|--------|--------------------|-------------------------|-------------------------------|----------------------------------|------------------|-----------------------------------------------------|--------------------------|-----------------------------------|-------------------------|---------------------------------|--------------|
| 8      | HNoV (GII)         | lake                    | none                          | $(4.6 \pm 8.1) \times 10^3$ GC/L | 10               | REXEED-25S (29 kDa) / none                          | 0.01% TW 80 <sup>†</sup> | not reported                      | PEG precipitation       | 2                               | <sup>9</sup> |

Notes for Table S2:

<sup>A</sup> HNoV (GII): human norovirus genogroup II; MNoV-1: murine norovirus-1

<sup>B</sup> DI: deionized water; DI+tap: mixture of equal volume of DI and tap; Gly: glycine

<sup>C</sup> NaPP: sodium polyphosphate

<sup>D</sup> GC/L: genome copy per liter; PFU/L: plaque forming unit per liter

<sup>E</sup> PS: polysulfone; CTA: cellulose triacetate. The value in parentheses is the molecular weight cutoff (MWCO) of the membrane filter; NA: not available; kDa: kilodalton

<sup>F</sup> Filter pretreatment, if any; BSA: bovine serum albumin; BE: beef extract; NaPP: sodium polyphosphate

<sup>G</sup> TW 80: Tween 80, NaPP: sodium polyphosphate. Additional features of the elution protocol:

± shaking 30 min

† crossflow

<sup>H</sup> Recoveries were rounded to nearest integer

**Table S3.** Adenovirus recovery by VIRADEL as a function of water matrix and VIRADEL process parameters.

| Exp. # | Virus <sup>A</sup> | Water type <sup>B</sup> | Sample amendment | Virus concentration <sup>C</sup> | Sample volume, L | Filter (+/-) <sup>D</sup> /Treatment <sup>E</sup> | Eluent <sup>F</sup>                                     | Primary recovery <sup>G</sup> , % | Secondary concentration <sup>H</sup> | Total recovery <sup>G</sup> , % | Ref. |
|--------|--------------------|-------------------------|------------------|----------------------------------|------------------|---------------------------------------------------|---------------------------------------------------------|-----------------------------------|--------------------------------------|---------------------------------|------|
| 1      | HAdV 41            | tap                     | none             | 8.5 to 1700 GC/L                 | 10 to 1500       | glass wool (+) / none                             | 3% BE<br>0.5 M Gly<br>pH 9.5 <sup>Δ</sup>               | not reported                      | PEG precipitation                    | 28                              | 1    |
| 2      |                    | ground I                |                  | (8 to 16)×10 <sup>2</sup> GC/L   | 20               |                                                   |                                                         |                                   |                                      | 22                              |      |
| 3      |                    | ground II               |                  |                                  |                  |                                                   |                                                         |                                   |                                      | 8                               |      |
| 4      | HAdV 2             | DI+tap                  | pH 3.5           | 2.6×10 <sup>6</sup> GC/L         | 10               | glass wool (+) / none                             | 3% BE<br>0.05 M Gly<br>pH 9.5                           | not reported                      | 3% BE flocculation                   | 2 to 7                          | 5    |
| 5      |                    |                         | none             |                                  |                  |                                                   |                                                         |                                   |                                      | 5.3×10 <sup>5</sup> GC/L        |      |
| 6      |                    |                         |                  | 1 to 2                           |                  |                                                   |                                                         |                                   |                                      |                                 |      |
| 7      |                    |                         |                  | 0.01 to 0.02                     |                  |                                                   |                                                         |                                   |                                      |                                 |      |
| 8      | HAdV 41            | sea                     | none             | 1.6×10 <sup>7</sup> GC/L         | 40               | NanoCeram (+) / none                              | 3% BE<br>0.1 M Gly<br>pH 9.5 <sup>Δ</sup>               | 1                                 | not performed                        | same as primary recovery        | 6    |
| 9      |                    |                         |                  |                                  |                  |                                                   | 3% BE<br>0.1 M Gly<br>pH 9.5 <sup>†</sup>               | 5 ± 3                             |                                      |                                 |      |
| 10     |                    |                         |                  |                                  |                  |                                                   | 3% BE<br>0.1 M Gly<br>0.1% TW 80<br>pH 9.5 <sup>†</sup> | 1 ± 0                             |                                      |                                 |      |

| Exp. # | Virus <sup>A</sup> | Water type <sup>B</sup> | Sample amendment         | Virus concentration <sup>C</sup>          | Sample volume, L | Filter (+/-) <sup>D</sup> / Treatment <sup>E</sup> | Eluent <sup>F</sup>                                      | Primary recovery <sup>G</sup> , % | Secondary concentration <sup>H</sup> | Total recovery <sup>G</sup> , % | Ref. |
|--------|--------------------|-------------------------|--------------------------|-------------------------------------------|------------------|----------------------------------------------------|----------------------------------------------------------|-----------------------------------|--------------------------------------|---------------------------------|------|
| 11     |                    |                         |                          | 4.5×10 <sup>5</sup> GC/L                  |                  |                                                    | 3% BE<br>0.1 M Gly<br>0.01% TW 80<br>pH 9.5 <sup>†</sup> | 1 ± 1                             |                                      |                                 |      |
| 12     |                    |                         |                          |                                           |                  |                                                    | soy-based eluent<br>pH 7.0 <sup>†</sup>                  | 0.2 ± 0.1                         |                                      |                                 |      |
| 13     |                    |                         |                          |                                           |                  |                                                    | soy-based eluent<br>0.01% TW 80<br>pH 7.0 <sup>†</sup>   | 1 ± 1                             |                                      |                                 |      |
| 14     |                    |                         |                          | 3% BE<br>0.1 M Gly<br>pH 9.5 <sup>†</sup> |                  |                                                    | 3 ± 2                                                    |                                   |                                      |                                 |      |
| 15     |                    | surface                 | 2.5×10 <sup>7</sup> GC/L |                                           |                  |                                                    | 2 ± 1                                                    |                                   |                                      |                                 |      |
| 16     |                    | treated-surface         | 1 ± 1                    |                                           |                  |                                                    |                                                          |                                   |                                      |                                 |      |
| 17     | HAdV 5             | sea                     | none                     | 10 <sup>3</sup> PFU/L                     | 1                | nanoalumina fiber (+) / none                       | 3% BE<br>pH 6.0 <sup>Δ</sup>                             | not reported                      | centrifugal UF                       | 82 ± 11                         | 16   |
| 18     |                    |                         |                          | 10 <sup>2</sup> PFU/L                     |                  |                                                    |                                                          |                                   |                                      | 37 ± 5                          |      |
| 19     |                    | RO treated sea          |                          | 10 <sup>3</sup> PFU/L                     |                  |                                                    |                                                          |                                   |                                      | 91 ± 12                         |      |
| 20     |                    |                         |                          | 10 <sup>2</sup> PFU/L                     |                  |                                                    |                                                          |                                   |                                      | 64 ± 8                          |      |
| 21     |                    | sewage effluent         |                          | 10 <sup>3</sup> PFU/L                     |                  |                                                    |                                                          |                                   |                                      | 86 ± 8                          |      |

| Exp. # | Virus <sup>A</sup> | Water type <sup>B</sup>         | Sample amendment | Virus concentration <sup>C</sup>        | Sample volume, L | Filter (+/-) <sup>D</sup> /Treatment <sup>E</sup> | Eluent <sup>F</sup>                                            | Primary recovery <sup>G</sup> , % | Secondary concentration <sup>H</sup>                 | Total recovery <sup>G</sup> , % | Ref. |
|--------|--------------------|---------------------------------|------------------|-----------------------------------------|------------------|---------------------------------------------------|----------------------------------------------------------------|-----------------------------------|------------------------------------------------------|---------------------------------|------|
| 22     |                    |                                 |                  | 10 <sup>2</sup> PFU/L                   |                  |                                                   |                                                                |                                   |                                                      | 44 ± 6                          |      |
| 23     |                    | sea                             | pH 3.5           | 10 <sup>3</sup> PFU/L                   | 0.2              | cellulose esters (-) / none                       | 0.5 mM H <sub>2</sub> SO <sub>4</sub> → 1 mM NaOH <sup>±</sup> |                                   |                                                      | 66 ± 10                         |      |
| 24     | RO treated sea     | 5 mM AlCl <sub>3</sub> , pH 3.5 | 90 ± 8           |                                         |                  |                                                   |                                                                |                                   |                                                      |                                 |      |
| 25     | sewage effluent    |                                 | 60 ± 8           |                                         |                  |                                                   |                                                                |                                   |                                                      |                                 |      |
|        |                    |                                 |                  |                                         |                  |                                                   |                                                                |                                   |                                                      |                                 |      |
| 26     | HAdV 41            | source water                    | pH 3.5           | 2.5×10 <sup>6</sup> GC/L                | 1                | cellulose esters (-) / none                       | 1.5% BE<br>0.75% glycerol<br>pH 9.0 <sup>±</sup>               | 55 ± 19                           | evaporation or centrifugal UF                        | not reported                    | 17   |
| 27     |                    |                                 | pH 4.5           |                                         |                  |                                                   |                                                                | <5                                |                                                      | not reported                    |      |
| 28     | HAdV 2             | tap                             | none             | 5×10 <sup>6</sup> TCID <sub>50</sub> /L | 20               | NanoCeram (+) / none                              | 1.0% NaPP PB<br>0.05M Gly<br>pH 9.3 <sup>±</sup>               | 39 ± 13                           | centrifugal UF                                       | 14 ± 4                          | 18   |
| 29     | HAdV 41            | DI                              | none             | 10 <sup>2</sup> IU/L                    | 10               | NanoCeram (+) / none                              | 1.5% BE<br>pH 9.8                                              | not reported                      | 1.5% BE,<br>0.1% FeCl <sub>3</sub> ,<br>flocculation | 19 ± 2                          | 7    |
| 30     |                    | tap                             |                  |                                         |                  |                                                   |                                                                |                                   |                                                      | 21 ± 3                          |      |
| 31     |                    | river                           |                  |                                         |                  |                                                   |                                                                |                                   |                                                      | 19 ± 3                          |      |
| 32     | HAdV 41            | lake                            | pH 6.5 to 7.0    | (5.9±3.4)×10 <sup>4</sup> GC/L          | 10               | glass wool (+) / none                             | 3% BE<br>0.5 M Gly<br>pH 9.5                                   | not reported                      | PEG precipitation                                    | 5                               | 9    |

| Exp. # | Virus <sup>A</sup> | Water type <sup>B</sup> | Sample amendment        | Virus concentration <sup>C</sup>        | Sample volume, L | Filter (+/-) <sup>D</sup> /Treatment <sup>E</sup> | Eluent <sup>F</sup>                                  | Primary recovery <sup>G</sup> , % | Secondary concentration <sup>H</sup>             | Total recovery <sup>G</sup> , % | Ref.                     |    |
|--------|--------------------|-------------------------|-------------------------|-----------------------------------------|------------------|---------------------------------------------------|------------------------------------------------------|-----------------------------------|--------------------------------------------------|---------------------------------|--------------------------|----|
| 33     |                    |                         | none                    |                                         |                  | NanoCeram (+) / none                              | 1.5% BE<br>0.05 M Gly<br>pH 9                        |                                   | Celite adsorption-elution<br>⇒ PEG precipitation | 0.02                            |                          |    |
| 34     | HAdV 40            | tap                     | none                    | 10 <sup>7</sup> to 10 <sup>8</sup> GC/L | 0.1              | 1MSD (+) / none                                   | 1.5% BE<br>0.05 M Gly<br>pH 7.5                      | not reported                      | Celite adsorption-elution                        | 24 ± 8                          | 19                       |    |
| 35     |                    |                         |                         |                                         |                  |                                                   | 1.5% BE<br>0.05 M Gly<br>pH 10                       |                                   |                                                  | 52 ± 22                         |                          |    |
| 36     | pH 5               |                         | 14 ± 7                  |                                         |                  |                                                   |                                                      |                                   |                                                  |                                 |                          |    |
| 37     | HAdV 41            |                         | none                    |                                         |                  |                                                   | 1.5% BE<br>0.05 M Gly<br>pH 7.5                      |                                   |                                                  | 9 ± 3                           |                          |    |
| 38     |                    |                         |                         |                                         |                  |                                                   | 1.5% BE<br>0.05 M Gly<br>pH 10                       |                                   |                                                  | 64 ± 4                          |                          |    |
| 39     |                    |                         |                         |                                         |                  |                                                   | pH 5                                                 |                                   |                                                  | 13 ± 4                          |                          |    |
| 40     | HAdV 7             | sea                     | 25 mM AlCl <sub>3</sub> | 10 <sup>5</sup> PFU/L                   | 1                | cellulose esters (-) / none                       | 0.5 mM H <sub>2</sub> SO <sub>4</sub><br>→ 1 mM NaOH | stirring#<br>30 min               | 79 ± 5                                           | not performed                   | same as primary recovery | 20 |
| 41     |                    |                         |                         |                                         |                  |                                                   |                                                      | shaking#<br>30 min                | 54                                               |                                 |                          |    |
| 42     |                    |                         |                         |                                         |                  |                                                   |                                                      | stirring#<br>45 min               | 52                                               |                                 |                          |    |



Notes for Table S3:

- A HAdV: human adenovirus.
- B DI: deionized water; DI+tap: mixture of equal volumes of DI water and tap water; source water: water collected from Water and Sewer Authority.
- C GC/L: genome copies per liter; PFU: plaque forming unit per liter; TCID<sub>50</sub>/L: 50% tissue culture infective dose per liter; IU/L: infectious unit per liter.
- D (+): electropositive filter; (-): electronegative filter.
- E Filter pretreatment, if any.
- F BE: beef extract; Gly: glycine; TW 80: Tween 80; PB: phosphate buffer (3.8 mM Na<sub>2</sub>HPO<sub>4</sub>, 6.5 mM KH<sub>2</sub>PO<sub>4</sub>); The arrow (→) indicates sequential application of eluents.

In most studies, the elution was performed by filtering the eluent. Additional features of the elution protocol:

- △ Filters were soaked in eluent first prior to filtration of eluent. See each study for specific contact time.
- † Eluent is recirculated.
- ⊥ Filter was placed into a tube containing NaOH and vortexed. See each study for specific vortex times.
- ⊥ Filter was immersed in the eluent. Filtration housing unit was inverted 10 times followed by 15 min of hold time. The procedure was performed 3 times prior to elution.
- # Filter was soaked in the flask containing NaOH and stirred with a magnetic bar.
- G Recoveries were rounded to the nearest integer (except when recoveries are below 1%).
- H The arrow (⇒) indicates the sequence of secondary concentration steps.

**Table S4.** Adenovirus recovery by crossflow ultrafiltration as a function of water matrix and ultrafiltration process parameters.

| Exp. # | Virus <sup>A</sup> | Water type <sup>B</sup> | Sample amendment <sup>C</sup> | Virus concentration, GC/L <sup>D</sup> | Sample volume, L | Filter (+/-) <sup>E</sup> / MWCO / Treatment <sup>F</sup> | Eluent <sup>G</sup>                    | Primary recovery <sup>H</sup> , % | Secondary concentration   | Total recovery <sup>H</sup> , % | Re f. |
|--------|--------------------|-------------------------|-------------------------------|----------------------------------------|------------------|-----------------------------------------------------------|----------------------------------------|-----------------------------------|---------------------------|---------------------------------|-------|
| 1      | HAdV 2             | DI + tap                | none                          | 2.6×10 <sup>6</sup>                    | 10               | Infilco Degremont filter / NA / 0.1% BSA                  | 1 mM NaOH <sup>±</sup>                 | not reported                      | centrifugal UF            | 3 to 6                          | 5     |
| 2      | HAdV 41            | lake                    | none                          | (5.9 ± 3.4)×10 <sup>4</sup>            | 10               | REXEED-25S / 29 kD / none                                 | 0.01% TW 80 <sup>†</sup>               | not reported                      | PEG precipitation         | 1                               | 9     |
| 3      | HAdV 5             | cell culture            | none                          | >10 <sup>12</sup>                      | 0.45             | PES / 750 kDa / none                                      | none                                   | ~75                               | not performed             | same as primary recovery        | 21    |
| 4      | HAdV 41            | tap                     | 0.01% NaPP                    | (2.5 ± 0.5)×10 <sup>3</sup>            | 100              | REXEED-25S / 30 kDa / none                                | 0.01%NaPP<br>0.01% TW 80               | 69 ± 12                           | Celite adsorption-elution | 68 ± 14                         | 22    |
| 5      |                    | river                   |                               | (2.6 ± 0.3)×10 <sup>3</sup>            | 50               |                                                           | 0.001% antifoam A <sup>†</sup>         | 56 ± 8                            |                           | 30 ± 19                         |       |
| 6      | HAdV 40            | DI                      | none                          | ~10 <sup>9</sup>                       | 1                | PES / 30 kDa) / 5% CS                                     | 0.01% NaPP<br>0.01% TW 80 <sup>†</sup> | pre: 54 ± 6<br>post: 99 ± 8       | not performed             | same as primary recovery        | 23    |
| 7      |                    | tap                     |                               |                                        |                  |                                                           |                                        | pre: 38 ± 9<br>post: ~90          |                           |                                 |       |
| 8      |                    | DI                      |                               |                                        |                  | pre: 75 ± 10<br>post:100 ± 7                              |                                        |                                   |                           |                                 |       |
| 9      |                    | tap                     |                               |                                        |                  | pre: 41 ± 10                                              |                                        |                                   |                           |                                 |       |

| Exp. # | Virus <sup>A</sup> | Water type <sup>B</sup> | Sample amendment <sup>C</sup> | Virus concentration, GC/L <sup>D</sup> | Sample volume, L          | Filter (+/-) <sup>E</sup> / MWCO / Treatment <sup>F</sup> | Eluent <sup>G</sup>                                  | Primary recovery <sup>H</sup> , % | Secondary concentration | Total recovery <sup>H</sup> , % | Re f. |
|--------|--------------------|-------------------------|-------------------------------|----------------------------------------|---------------------------|-----------------------------------------------------------|------------------------------------------------------|-----------------------------------|-------------------------|---------------------------------|-------|
|        |                    |                         |                               |                                        |                           |                                                           |                                                      | post: ~ 90                        |                         |                                 |       |
| 10     |                    | lake I                  |                               |                                        |                           | PES / 30 kDa / 5% CS                                      | 0.01% NaPP<br>0.01% TW 80<br>0.01% EDTA <sup>†</sup> | pre: ~40<br>post: 61 ± 3          |                         |                                 |       |
| 11     |                    | lake II                 |                               |                                        | pre: ~20<br>post: 35 ± 10 |                                                           |                                                      |                                   |                         |                                 |       |
| 12     |                    | lake II                 |                               |                                        | pre: ~20<br>post: ~84     |                                                           |                                                      |                                   |                         |                                 |       |
| 13     |                    | lake I                  |                               |                                        | PES / 30 kDa / PEM        | 0.01% NaPP<br>0.01% TW 80 <sup>†</sup>                    | pre: ~40<br>post: 62 ± 2                             |                                   |                         |                                 |       |
| 14     |                    | lake II                 |                               |                                        |                           |                                                           | pre: ~20<br>post: 42 ± 2                             |                                   |                         |                                 |       |
| 15     |                    | lake II                 |                               |                                        |                           |                                                           | pre: ~20<br>post: ~84                                |                                   |                         |                                 |       |

Notes for Table S4:

<sup>A</sup> HAdV : human adenovirus

<sup>B</sup> DI: deionized water; DI+tap: mixture of equal volume of DI and tap;

- C NaPP: sodium polyphosphate
- D GC/L: genome copy per liter
- E PES: polyethersulfone; The value in parentheses is the molecular weight cutoff (MWCO) of the membrane filter; NA: not available; kDa: kilodalton
- F Filter pretreatment, if any; BSA: bovine serum albumin; CS: calf serum; PEM: polyelectrolyte multilayer
- G TW 80: Tween 80, NaPP: sodium polyphosphate; EDTA: Ethylenediaminetetraacetic acid. Additional features of the elution protocol:
  - ± shaking for 30 min
  - † crossflow
- H Recoveries were rounded to the nearest integer; pre: pre-elution recovery; post: post-elution recovery

**Table S5.** Primary recovery of bacteriophage MS2 by VIRADEL as a function of water matrix and VIRADEL process parameters.

| Exp. # | Water type <sup>A</sup> | Sample amendment                    | Virus concentration, PFU/L <sup>B</sup> | Sample volume, L | Filter (+/-) <sup>C</sup> /Treatment <sup>D</sup> | Eluent <sup>E</sup>                       | Primary recovery <sup>F</sup> ,                                        | Ref. |         |
|--------|-------------------------|-------------------------------------|-----------------------------------------|------------------|---------------------------------------------------|-------------------------------------------|------------------------------------------------------------------------|------|---------|
| 1      | tap                     | pH 3.5                              | not reported                            | 10               | filterite (-)<br>/ none                           | 5% BE<br>0.1% TW 80<br>pH 7               | 67±11                                                                  | 24   |         |
| 2      |                         | 0.1 M MnCl <sub>2</sub> ,<br>pH 3.5 | not reported                            |                  |                                                   |                                           | 79±14                                                                  |      |         |
| 3      | tap                     | pH 6.5 to 7                         | 10 <sup>6</sup>                         | 1                | 1-MDS (+)<br>/ none                               | 1.5% BE<br>0.05M Gly<br>pH 8 <sup>Δ</sup> | 31 ± 12                                                                | 25   |         |
| 4      |                         |                                     |                                         |                  |                                                   |                                           | 1.5% BE<br>0.05M Gly<br>pH 9 <sup>Δ</sup>                              |      | 24 ± 5  |
| 5      |                         |                                     |                                         |                  |                                                   |                                           | 1.5% BE<br>0.05 M Gly<br>0.01% TW 80<br>pH 8 <sup>Δ</sup>              |      | 31 ± 4  |
| 6      |                         |                                     |                                         |                  |                                                   |                                           | 1.5% BE<br>0.05 M Gly<br>0.01% TW 80<br>0.1% NaPP<br>pH 8 <sup>∇</sup> |      | 92 ± 10 |
| 7      |                         |                                     |                                         |                  |                                                   |                                           | 1.5% BE<br>0.05 M Gly<br>0.01% TW 80<br>0.1% NaPP<br>pH 8 <sup>Δ</sup> |      | 89 ± 10 |

| Exp. # | Water type <sup>A</sup> | Sample amendment | Virus concentration, PFU/L <sup>B</sup> | Sample volume, L | Filter (+/-) <sup>C</sup> /Treatment <sup>D</sup> | Eluent <sup>E</sup>                                         | Primary recovery <sup>F</sup> , | Ref. |
|--------|-------------------------|------------------|-----------------------------------------|------------------|---------------------------------------------------|-------------------------------------------------------------|---------------------------------|------|
| 8      |                         |                  | 10 <sup>3</sup>                         |                  |                                                   |                                                             | 44 ± 9                          |      |
| 9      |                         |                  | 5×10 <sup>4</sup>                       | 20               |                                                   | 1.5% BE<br>0.05 M Gly<br>0.01% TW 80<br>0.1% NaPP<br>pH 8▼  | 32 ± 13                         |      |
| 10     | sea <sup>G</sup>        | none             | (1.5 to 4.6)×10 <sup>5</sup>            | 0.1              | cellulose ester (-)<br>/ none                     | 1.5% BE<br>pH 9*                                            | 35                              | 26   |
| 11     |                         |                  |                                         |                  |                                                   | 0.5 mM H <sub>2</sub> SO <sub>4</sub><br>→ 1.5% BE<br>pH 9* | 20                              |      |
| 12     |                         |                  |                                         |                  |                                                   | 1mM NaOH*                                                   | 16                              |      |
| 13     |                         |                  |                                         |                  |                                                   | 0.5 mM H <sub>2</sub> SO <sub>4</sub><br>→ 1.5% BE<br>pH 9  | 9                               |      |
| 14     |                         |                  |                                         |                  |                                                   | 1mM NaOH                                                    | 6                               |      |
| 15     |                         |                  |                                         |                  |                                                   | 0.5mM H <sub>2</sub> SO <sub>4</sub><br>→ 1mM NaOH          | 2                               |      |
| 16     | DI                      | none             | 5×10 <sup>4</sup>                       | 20               | NanoCeram (+)<br>/ none                           | 1.5% BE<br>0.05M Gly<br>0.01% TW 80<br>pH 9.5 <sup>Δ</sup>  | 65 ± 23                         | 27   |

| Exp. # | Water type <sup>A</sup> | Sample amendment       | Virus concentration, PFU/L <sup>B</sup> | Sample volume, L | Filter (+/-) <sup>C</sup> / Treatment <sup>D</sup> | Eluent <sup>E</sup>                                  | Primary recovery <sup>F</sup> , % | Ref. |
|--------|-------------------------|------------------------|-----------------------------------------|------------------|----------------------------------------------------|------------------------------------------------------|-----------------------------------|------|
| 17     |                         |                        |                                         |                  | 1-MDS (+)<br>/ none                                |                                                      | 30 ± 10                           |      |
| 18     | sea                     |                        |                                         |                  | NanoCeram (+)<br>/ none                            |                                                      | 63 ± 13                           |      |
| 19     |                         | 0.1M MgCl <sub>2</sub> |                                         |                  | nitrocellulose ester(-)<br>/ none                  | 0.5mM H <sub>2</sub> SO <sub>4</sub><br>→ 1mM NaOH   | 15 ± 5                            |      |
| 20     | tap                     | none                   | ~5×10 <sup>2</sup>                      | 20               | NanoCeram (+)<br>/ none                            | 1.0% NaPP<br>PB<br>0.05 M Gly<br>pH 9.3 <sup>±</sup> | 86 ± 9                            | 18   |
| 21     |                         |                        |                                         |                  |                                                    | 57 ± 3                                               |                                   |      |
| 22     |                         |                        |                                         |                  |                                                    | 26 ± 4                                               |                                   |      |
| 23     |                         |                        |                                         |                  |                                                    | 34 ± 18                                              |                                   |      |
| 24     |                         |                        |                                         |                  |                                                    | 0.4 ± 0.5                                            |                                   |      |
| 25     |                         |                        |                                         |                  |                                                    | 12 ± 1                                               |                                   |      |
| 26     |                         |                        |                                         |                  |                                                    | 26 ± 5                                               |                                   |      |
|        |                         | ~5×10 <sup>6</sup>     |                                         |                  |                                                    |                                                      |                                   |      |

| Exp. # | Water type <sup>A</sup> | Sample amendment                   | Virus concentration, PFU/L <sup>B</sup> | Sample volume, L | Filter (+/-) <sup>C</sup> /Treatment <sup>D</sup> | Eluent <sup>E</sup>                                                                                                                       | Primary recovery <sup>F</sup> , | Ref. |
|--------|-------------------------|------------------------------------|-----------------------------------------|------------------|---------------------------------------------------|-------------------------------------------------------------------------------------------------------------------------------------------|---------------------------------|------|
| 27     |                         |                                    |                                         |                  |                                                   | PB<br>0.05 M Gly<br>pH 7.5 <sup>L</sup>                                                                                                   | 24 ± 7                          |      |
| 28     |                         |                                    |                                         |                  |                                                   | PB<br>0.05 M Gly<br>0.3% TW 80<br>pH 9.3 <sup>L</sup>                                                                                     | 37 ± 2                          |      |
| 29     |                         |                                    |                                         |                  |                                                   | 0.1% NaPP<br>PB<br>0.05 M Gly<br>pH 9.3 <sup>L</sup>                                                                                      | 40 ± 7                          |      |
| 30     |                         |                                    |                                         |                  |                                                   | 0.6 M NaI<br>PB<br>0.05 M Gly<br>pH 9.3 <sup>L</sup>                                                                                      | 3 ± 2                           |      |
| 31     |                         | 0.05 M MgCl <sub>2</sub>           |                                         |                  |                                                   | 3% BE<br>0.5 M NaCl<br>pH 9 <sup>±</sup>                                                                                                  | 52 ± 6                          |      |
| 32     | river+DI                | 0.05 M MgCl <sub>2</sub><br>pH 3.5 | 10 <sup>7</sup>                         | 0.1              | cellulose ester (-)<br>/ none                     | 0.5 mM H <sub>2</sub> SO <sub>4</sub><br>→0.05 M KH <sub>2</sub> PO <sub>4</sub><br>0.1 M NaCl<br>0.1% TritonX-100<br>pH 9.2 <sup>±</sup> | 16 ± 3                          | 28   |
| 33     |                         | none                               |                                         |                  | Zeta Plus<br>60S (+)<br>/ none                    | 2.9% TPB<br>6%Gly<br>pH 9 <sup>±</sup>                                                                                                    | 1 ± 0                           |      |



| Exp. # | Water type <sup>A</sup> | Sample amendment | Virus concentration, PFU/L <sup>B</sup> | Sample volume, L | Filter (+/-) <sup>C</sup> /Treatment <sup>D</sup> | Eluent <sup>E</sup>                                | Primary recovery <sup>F</sup> , | Ref. |
|--------|-------------------------|------------------|-----------------------------------------|------------------|---------------------------------------------------|----------------------------------------------------|---------------------------------|------|
| 34     |                         |                  |                                         |                  |                                                   | PB<br>1% NaPP<br>0.05 M Gly<br>pH 9.3 <sup>△</sup> | 2 ± 0                           |      |
| 35     |                         | pH 5.5 to 6      |                                         |                  |                                                   | 0.05 M arginine<br>1% BE                           | 0.04 ± 0.05                     |      |

Notes on Table S5:

- <sup>A</sup> DI: deionized water; river+DI: river water diluted with sterile water
- <sup>B</sup> PFU/L: plaque forming units per liter
- <sup>C</sup> (+): electropositive filter; (-): electronegative filter
- <sup>D</sup> Filter pretreatment, if any
- <sup>E</sup> BE: beef extract; TW 80: Tween 80; Gly: glycine; NaPP: sodium polyphosphate; PB: phosphate buffer (3.8 mM Na<sub>2</sub>HPO<sub>4</sub>, 6.5 mM KH<sub>2</sub>PO<sub>4</sub>); TPB: tryptose phosphate buffer; The arrow (→) indicates sequential application of eluents. In most studies, elution was performed by filtering the eluent, but the elution protocol could include additional features. These features are marked as follows:
- <sup>△</sup> Filters were soaked in eluent first prior to filtration of eluent. See each study for specific contact time
- <sup>‡</sup> Eluent heated to 37 °C
- <sup>▼</sup> Eluent was pumped in the direction opposite to that of the water sample flow, then filter was soaked for 10 min in the eluent prior to eluent collection

- \* Sample prefiltered through PVDF membrane and drop-by-drop elution was performed
- ↳ Filter was immersed in the eluent. Filtration housing unit was inverted 10 times followed by 15 min hold time. Such procedure was performed 3 times prior to filtering the eluent
- ↳ Filter was placed feed side down in a Petri dish containing eluent
- F Recoveries were rounded to the nearest integer (except for recoveries < 1%)
- G This work was performed with an indigenous coliphage (and not MS2 specifically). The study is included in the Table as illustrative of the effect of the eluent on coliphage recovery.

**Table S6.** Primary recovery of bacteriophage MS2 by crossflow ultrafiltration as a function of water matrix and ultrafiltration process parameters.

| Exp. # | Water type <sup>A</sup> | Sample amendment <sup>B</sup> | Virus concentration, PFU/L <sup>C</sup> | Sample volume, L | Filter (MWCO/size) <sup>D</sup> /Treatment <sup>E</sup> | Eluent <sup>F</sup>                    | Primary recovery <sup>G</sup> , | Ref. |                               |
|--------|-------------------------|-------------------------------|-----------------------------------------|------------------|---------------------------------------------------------|----------------------------------------|---------------------------------|------|-------------------------------|
| 1      | tap                     | none                          | ~10 <sup>5</sup>                        | 10               | PS (15 to 20 kDa)/none                                  | none                                   | 44 ± 30                         | 29   |                               |
| 2      |                         |                               |                                         |                  | PS (15 to 20 kDa) / 5% FBS (overnight)                  |                                        | 51 ± 19                         |      |                               |
| 3      |                         |                               |                                         |                  | PS (15 to 20 kDa) / 5% FBS (1 hour)                     |                                        | 50 ± 14                         |      |                               |
| 4      |                         | 0.1% NaPP                     |                                         |                  |                                                         | PS (15 to 20 kDa) / 5% FBS (overnight) | 0.1% NaPP‡                      |      | 108 ± 16                      |
| 5      |                         |                               |                                         |                  |                                                         | PS (15 to 20 kDa) / 5% FBS (1 hour)    |                                 |      | 71 ± 11                       |
| 6      |                         |                               |                                         |                  |                                                         | PS (15 to 20 kDa) / 5% CS              |                                 |      | pre: 84 ± 13<br>post: 89 ± 15 |
| 7      |                         |                               |                                         |                  |                                                         | PS (15 to 20 kDa) / 0.1% NaPP          |                                 |      | pre: 71 ± 25<br>post: 82 ± 25 |

| Exp. # | Water type <sup>A</sup> | Sample amendm ent <sup>B</sup> | Virus concentration, PFU/L <sup>C</sup> | Sample volume, L | Filter (MWCO/size) <sup>D</sup> /Treatment <sup>E</sup> | Eluent <sup>F</sup>                                            | Primary recovery <sup>G</sup> , | Ref. |                         |          |
|--------|-------------------------|--------------------------------|-----------------------------------------|------------------|---------------------------------------------------------|----------------------------------------------------------------|---------------------------------|------|-------------------------|----------|
| 8      |                         | 0.01% NaPP                     |                                         |                  | PS (15 to 20 kDa) / 0.01% NaPP                          | 0.01% NaPP <sup>‡</sup>                                        | pre: 86 ± 20                    |      |                         |          |
| 9      |                         | 0.01% TW 80                    |                                         |                  |                                                         |                                                                | post: 96 ± 21                   |      |                         |          |
| 10     |                         | 0.002% TW 80                   |                                         |                  |                                                         |                                                                | pre: 105 ± 23                   |      |                         |          |
| 11     |                         | none                           |                                         |                  | PS (15 to 20 kDa) / none                                | tap <sup>‡</sup>                                               | post: 106 ± 23                  |      |                         |          |
| 12     |                         | 0.01% NaPP                     |                                         |                  |                                                         |                                                                | PS (15 to 20 kDa) / 0.01% NaPP  |      | 0.01% NaPP <sup>‡</sup> | pre: 70  |
| 13     |                         |                                |                                         |                  |                                                         |                                                                |                                 |      |                         | post: 73 |
| 14     |                         |                                |                                         |                  |                                                         |                                                                |                                 |      |                         | 34±28    |
| 15     | tap                     | 0.01% NaPP                     | 720 ± 240                               | 100              | PS (30 kDa) / 5% CS                                     | 0.01% NaPP<br>0.01% TW 80<br>0.001% antifoam Y-30 <sup>†</sup> | 59 ± 10                         | 30   |                         |          |

| Exp. # | Water type <sup>A</sup> | Sample amendment <sup>B</sup> | Virus concentration, PFU/L <sup>C</sup> | Sample volume, L | Filter (MWCO/size) <sup>D</sup> /Treatment <sup>E</sup> | Eluent <sup>F</sup>                                                                                           | Primary recovery <sup>G</sup> , | Ref. |
|--------|-------------------------|-------------------------------|-----------------------------------------|------------------|---------------------------------------------------------|---------------------------------------------------------------------------------------------------------------|---------------------------------|------|
| 16     | tap                     | none                          | ~10 <sup>4</sup>                        | 100              | PS (30 kDa) / 0.1% NaPP                                 | 0.01% NaPP<br>0.5% TW 80<br>0.001% antifoam A <sup>‡</sup>                                                    | 52 ± 34                         | 31*  |
| 17     |                         | 0.01% NaPP                    |                                         |                  |                                                         | 0.01% NaPP<br>0.1% TW 80<br>0.001% antifoam A <sup>‡</sup>                                                    | 84 ± 12                         |      |
| 18     |                         |                               |                                         |                  |                                                         | 0.01% NaPP<br>0.1% TW 80<br>0.001% antifoam A <sup>‡</sup>                                                    | 94 ± 11                         |      |
| 19     |                         |                               |                                         |                  |                                                         | 0.01% NaPP<br>0.1% TW 80<br>0.001% antifoam A <sup>†</sup>                                                    | 53 ± 13                         |      |
| 20     | tap                     | none                          | 10 <sup>4</sup>                         | 100              | PS & CTA (20 to 70 kDa) /0.5% CS                        | 0.001% TW 80 <sup>‡</sup>                                                                                     | 64 ± 48                         | 32   |
| 21     | river                   | none                          | 5×10 <sup>4</sup>                       | 20               | PES (30 kDa) / none                                     | 1%BE, 0.4% Gly<br>pH 9.5 <sup>†</sup>                                                                         | 73 to 84                        | 33   |
| 22     |                         |                               |                                         |                  |                                                         | MilliQ water (1 <sup>#</sup> ) <sup>†</sup><br>→<br>1%BE<br>0.4% Gly<br>pH 9.5 (2 <sup>#</sup> ) <sup>†</sup> | 42 to 64                        |      |
| 23     | DI                      | none                          | 2×10 <sup>9</sup>                       | 5                | PS (15 to 20 kDa) / none                                | none                                                                                                          | 30 ± 7                          | 14   |

| Exp. # | Water type <sup>A</sup>     | Sample amendm ent <sup>B</sup> | Virus concentration, PFU/L <sup>C</sup> | Sample volume, L | Filter (MWCO/size) <sup>D</sup> /Treatment <sup>E</sup> | Eluent <sup>F</sup> | Primary recovery <sup>G</sup> , | Ref. |
|--------|-----------------------------|--------------------------------|-----------------------------------------|------------------|---------------------------------------------------------|---------------------|---------------------------------|------|
| 24     |                             |                                |                                         |                  | PS (15 to 20 kDa) / 3% BE                               |                     | 54 ± 24                         |      |
| 25     | DI + 0.05 M Gly 0.14 M NaCl |                                |                                         |                  | PS (15 to 20 kDa) / none                                |                     | 34 ± 16                         |      |
| 26     |                             |                                |                                         |                  | PS (15 to 20 kDa) / 3% BE                               |                     | 33 ± 19                         |      |
| 27     |                             |                                |                                         |                  | PS (15 to 20 kDa) / none                                |                     | 18 ± 10                         |      |
| 28     | DI+ 100 mM Tris-HCl         |                                |                                         |                  | PS (15 to 20 kDa) / 3% BE                               |                     | 29 ± 7                          |      |
| 29     | tap                         | 0.01% NaPP                     | $(4.9 \pm 1.4) \times 10^2$             | 100              | REXEED-25S (30 kDa) / none                              | none                | 65 ± 5 <sup>a</sup>             | 34   |
| 30     |                             |                                | $(7.4 \pm 6.8) \times 10^2$             |                  |                                                         |                     | 99 ± 5 <sup>b</sup>             |      |
| 31     | treated wastewater          | none                           | 630±340                                 | 10               | PS (30 kDa) / 5% CS                                     | none                | 84 ± 2                          | 35   |
| 32     |                             |                                |                                         |                  | PS (30 kDa) / none                                      |                     | 79 ± 18                         |      |
| 33     |                             |                                |                                         |                  | PS (65 kDa) / 5% CS                                     |                     | 80 ± 6                          |      |

| Exp. # | Water type <sup>A</sup> | Sample amendm ent <sup>B</sup> | Virus concentration, PFU/L <sup>C</sup> | Sample volume, L | Filter (MWCO/size) <sup>D</sup> /Treatment <sup>E</sup> | Eluent <sup>F</sup>                                        | Primary recovery <sup>G</sup> , | Ref. |
|--------|-------------------------|--------------------------------|-----------------------------------------|------------------|---------------------------------------------------------|------------------------------------------------------------|---------------------------------|------|
| 34     |                         |                                |                                         |                  | PS (65 kDa) / none                                      |                                                            | 42 ± 12                         |      |
| 35     |                         |                                |                                         |                  | CTA (70 kDa) / 5% CS                                    |                                                            | 87 ± 10                         |      |
| 36     |                         |                                |                                         |                  | CTA (70 kDa) / none                                     |                                                            | 88 ± 15                         |      |
| 37     |                         |                                |                                         |                  | PS (30 kDa) / none                                      | none                                                       | 110 ± 18                        |      |
| 38     |                         |                                |                                         |                  | PS (30 kDa) / none                                      | 0.01% NaPP, 0.01% TW 80, 0.001% antifoam Y-30 <sup>†</sup> | 120 ± 20                        |      |
| 39     |                         |                                |                                         |                  | CTA (70 kDa) / none                                     | none                                                       | 80 ± 14                         |      |
| 40     |                         |                                |                                         |                  | CTA (70 kDa) / none                                     | 0.01% NaPP, 0.01% TW 80, 0.001% antifoam Y-30 <sup>†</sup> | 130 ± 10                        |      |
| 41     | tap                     | none                           | 9×10 <sup>3</sup> to 2×10 <sup>7</sup>  | 10               | PES (20 nm) / none                                      | water <sup>†</sup>                                         | 31 ± 8                          | 36   |
| 42     | lake                    | none                           | (4.6±3.1)×10 <sup>4</sup>               | 10               | REXEED-25S (29 kDa) / none                              | 0.01% TW 80 <sup>†</sup>                                   | 68                              | 9    |

| Exp. # | Water type <sup>A</sup> | Sample amendm ent <sup>B</sup> | Virus concentration, PFU/L <sup>C</sup> | Sample volume, L | Filter (MWCO/size) <sup>D</sup> /Treatment <sup>E</sup> | Eluent <sup>F</sup>                                            | Primary recovery <sup>G</sup> , | Ref. |
|--------|-------------------------|--------------------------------|-----------------------------------------|------------------|---------------------------------------------------------|----------------------------------------------------------------|---------------------------------|------|
| 43     | river                   | 0.01% NaPP                     | $(1.2 \pm 0.5) \times 10^2$             | 50               | PS (30 kDa) / 5% CS                                     | 0.01% NaPP<br>0.01% TW 80<br>0.001% antifoam Y-30 <sup>†</sup> | 91 ± 38                         | 37   |
| 44     | lake I                  |                                |                                         |                  |                                                         |                                                                | 65 ± 33                         |      |
| 45     | lake II                 |                                |                                         |                  |                                                         |                                                                | 53 ± 19                         |      |
| 46     | ground I                |                                |                                         |                  |                                                         |                                                                | 85 ± 23                         |      |
| 47     | ground II               |                                |                                         |                  |                                                         |                                                                | 77 ± 8                          |      |

Notes on Table S6:

<sup>A</sup> DI: deionized water; Gly: glycine

<sup>B</sup> NaPP: sodium polyphosphate; TW 80: Tween 80

<sup>C</sup> PFU/L: plaque forming units per liter

<sup>D</sup> PS: polysulfone; CTA: cellulose triacetate; PS & CTA: recovery averaged with polysulfone membrane and cellulose triacetate membrane; PES: polyethersulfone; The value in parentheses is the molecular weight cutoff (MWCO) or pore



size of the membrane filter

- E Filter pretreatment, if any; FBS: fetal bovine serum; CS: calf serum; NaPP: sodium polyphosphate; BE: beef extract
- F NaPP: sodium polyphosphate; TW 80: Tween 80; TW 20: Tween 20; BE: beef extract; Gly: glycine; The arrow (→) indicates sequential application of eluents. Additional features of the elution protocol are marked as follows:
  - † crossflow
  - ‡ backflush
  - # Number of rinses (1#: rinsed once; 2#: rinsed twice)
- G Recoveries were rounded to the nearest integer; pre: pre-elution recovery; post: post-elution recovery
  - <sup>a</sup> recovery at a high filtration rate (2500 mL/min)
  - <sup>b</sup> recovery at a low filtration rate (1750 mL/min)
- \* In this paper, Polaczyk et al. performed secondary concentration as well and reported only one recovery value: “ultrafiltration recovery efficiency”. It is this value that is included herein

## References

1. E. Lambertini, S. K. Spencer, P. D. Bertz, F. J. Loge, B. A. Kieke and M. A. Borchardt, *Appl. Environ. Microbiol.*, 2008, **74**, 2990-2996.
2. M. Victoria, F. Guimaraes, T. Fumian, F. Ferreira, C. Vieira, J. P. Leite and M. Miagostovich, *J. Virol. Methods*, 2009, **156**, 73-76.
3. M. R. Karim, E. R. Rhodes, N. Brinkman, L. Wymer and G. S. Fout, *Appl. Environ. Microbiol.*, 2009, **75**, 2393-2399.
4. E. Haramoto, H. Katayama, E. Utagawa and S. Ohgaki, *J. Virol. Methods*, 2009, **160**, 206-209.
5. N. Albinana-Gimenez, P. Clemente-Casares, B. Calgua, J. M. Huguet, S. Courtois and R. Girones, *J. Virol. Methods*, 2009, **158**, 104-109.
6. C. D. Gibbons, R. A. Rodriguez, L. Tallon and M. D. Sobsey, *J. Appl. Microbiol.*, 2010, **109**, 635-641.
7. X. L. Pang, B. E. Lee, K. Pabbaraju, S. Gabos, S. Craik, P. Payment and N. Neumann, *J. Virol. Methods*, 2012, **184**, 77-83.
8. H. Lee, M. Kim, S. Y. Paik, C. H. Lee, W. H. Jheong, J. Kim and G. Ko, *J. Water Health*, 2011, **9**, 27-36.
9. D. S. Francy, E. A. Stelzer, A. M. Brady, C. Huitger, R. N. Bushon, H. S. Ip, M. W. Ware, E. N. Villegas, V. Gallardo and H. D. Lindquist, *Appl. Environ. Microbiol.*, 2013, **79**, 1342-1352.
10. W. M. El-Senousy, M. I. Costafreda, R. M. Pinto and A. Bosch, *Int. J. Food Microbiol.*, 2013, **167**, 74-79.
11. J. L. Cashdollar, N. E. Brinkman, S. M. Griffin, B. R. McMinn, E. R. Rhodes, E. A. Varughese, A. C. Grimm, S. U. Parshionikar, L. Wymer and G. S. Fout, *Appl. Environ. Microbiol.*, 2013, **79**, 215-223.
12. A. Hata, K. Matsumori, M. Kitajima and H. Katayama, *Food Environ. Virol.*, 2015, **7**, 7-13.
13. A. De Keuckelaere, L. Baert, A. Duarte, A. Stals and M. Uyttendaele, *J. Virol. Methods*, 2013, **187**, 294-303.
14. H. Kim, H. Park and G. Ko, *J. Food Protect.*, 2009, **72**, 2547-2552.
15. K. E. Gibson and K. J. Schwab, *Appl. Environ. Microbiol.*, 2011, **77**, 385-391.

16. D. Li, H. C. Shi and S. C. Jiang, *J. Microbiol. Methods*, 2010, **81**, 33-38.
17. J. Wu, R. A. Rodriguez, J. R. Stewart and M. D. Sobsey, *J. Appl. Microbiol.*, 2011, **110**, 1332-1340.
18. L. A. Ikner, M. Soto-Beltran and K. R. Bright, *Appl. Environ. Microbiol.*, 2011, **77**, 3500-3506.
19. B. R. McMinn, *J. Virol. Methods*, 2013, **193**, 284-290.
20. S. Sun, Y. L. Shi, H. I. Tong, W. Kang, Z. Wang, E. Allmann and Y. A. Lu, *J. Virol. Methods*, 2016, **229**, 78-85.
21. P. Nestola, D. L. Martins, C. Peixoto, S. Roederstein, T. Schleuss, P. M. Alves, J. P. B. Mota and M. J. T. Carrondo, *PLOS ONE*, 2014, **9**.
22. E. R. Rhodes, E. M. Huff, D. W. Hamilton and J. L. Jones, *J. Virol. Methods*, 2016, **228**, 31-38.
23. H. Shi, I. Xagorarakis, K. N. Parent, M. L. Bruening and V. V. Tarabara, *Appl. Environ. Microbiol.*, 2016, **82**, 4982-4993.
24. T. M. Scott, J. Lukasik and S. R. Farrah, *Can. J. Microbiol.*, 2002, **48**, 305-310.
25. A. L. Polaczyk, J. M. Roberts and V. R. Hill, *J. Microbiol. Methods*, 2007, **68**, 260-266.
26. A. M. Abdelzaher, H. M. Solo-Gabriele, M. E. Wright and C. J. Palmer, *J. Environ. Qual.*, 2008, **37**, 1648-1655.
27. H. B. Bennett, H. D. O'Dell, G. Norton, G. Shin, F. C. Hsu and J. S. Meschke, *Water Sci. Technol.*, 2010, **61**, 317-322.
28. T. H. Jones, V. Muehlhauser and G. Thériault, *J. Virol. Methods*, 2014, **206**, 5-11.
29. V. R. Hill, A. L. Polaczyk, D. Hahn, J. Narayanan, T. L. Cromeans, J. M. Roberts and J. E. Amburgey, *Appl. Environ. Microbiol.*, 2005, **71**, 6878-6884.
30. V. R. Hill, A. M. Kahler, N. Jothikumar, T. B. Johnson, D. Hahn and T. L. Cromeans, *Appl. Environ. Microbiol.*, 2007, **73**, 4218-4225.
31. A. L. Polaczyk, J. Narayanan, T. L. Cromeans, D. Hahn, J. M. Roberts, J. E. Amburgey and V. R. Hill, *J. Microbiol. Methods*, 2008, **73**, 92-99.
32. P. M. Holowecky, R. R. James, D. P. Lorch, S. E. Straka and H. D. A. Lindquist, *J. Appl. Microbiol.*, 2009, **106**, 738-747.
33. S. Skrabber, C. Gantzer, K. Helmi, L. Hoffmann and H. M. Cauchie, *Food Environ. Virol.*, 2009, **1**, 66-76.

34. E. R. Rhodes, D. W. Hamilton, M. J. See and L. Wymer, *J. Virol. Methods*, 2011, **176**, 38-45.
35. P. B. Liu, V. R. Hill, D. Hahn, T. B. Johnson, Y. Pan, N. Jothikumar and C. L. Moe, *J. Microbiol. Methods*, 2012, **88**, 155-161.
36. L. Pei, M. Rieger, S. Lengger, S. Ott, C. Zawadsky, N. M. Hartmann, H. C. Selinka, A. Tiehm, R. Niessner and M. Seidel, *Environ. Sci. Technol.*, 2012, **46**, 10073-10080.
37. A. M. Kahler, T. B. Johnson, D. Hahn, J. Narayanan, G. Derado and V. R. Hill, *Water*, 2015, **7**, 1202-1216.
